# Supplementary material for: A comprehensive evaluation of the use of Lagrangian particle dispersion models for inverse modeling of greenhouse gas emissions
Source: Copernicus journal article supplement (doi:10.5194/gmd-15-8295-2022), 2022-11-18
Supplement: Supplementary file [file gmd-15-8295-2022-supplement-title-page.pdf › gmd-15-8295-2022-supplement-title-page.pdf]

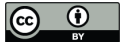

*Supplement of*

## **A comprehensive evaluation of the use of Lagrangian particle dispersion models for inverse modeling of greenhouse gas emissions**

**Martin Vojta et al.**

*Correspondence to:* Martin Vojta ([martin.vojta@univie.ac.at](mailto:martin.vojta@univie.ac.at))

- [gmd-15-8295-2022-supplement-title-page.pdf](#)
- [SETTINGS\\_ghg\\_config](#)
- [Supplementary\\_Figures.pdf](#)

The copyright of individual parts of the supplement might differ from the article licence.
